# Supplementary material
Source: PubMed Central journal article supplement (PMC2732858)
Supplement: 0905118106_0905118106SI.pdf [file 0905118106_0905118106SI.pdf]

# Supporting Information

Daniel and Lange 10.1073/pnas.0905118106

## SI Results

### Sumoylation of PR Represses Basal Proliferation in Breast Cancer Cells.

Distinct from MTT assays, progestins are clearly pro-survival and mitogenic to cells growing in soft agar (5). However, only cells expressing wt or K388R PR-B were sensitive to added progestin; cells expressing transcriptionally repressed (i.e., sumoylated) S294A PRs formed few colonies and were resistant to added ligand (Fig. S1). PR-B receptors that are capable of undergoing sumoylation (wt PR and S294A PR) repress breast cancer cell proliferation, whereas desumoylated (K388R) receptors promote increased proliferation.

### Sumoylated PR-B Regulates Gene Expression via Altered Cofactor Recruitment.

To first examine whether STC1 expression was sensitive to chromatin remodeling/HDAC activity we treated cells with an HDAC inhibitor (TSA) and assessed STC1 and  $\beta$ -actin transcript levels (Fig. S5A). STC1 expression was increased in all cell lines in response to the pan-HDAC inhibitor, TSA. However, when these data are normalized to account for the differences in basal STC1 expression levels between cell lines, only cells expressing wt PR-B exhibited a significant (23-fold) increase in STC1 expression in the presence of TSA relative to PR-null cells or cells expressing K388R PR.

## SI Materials and Methods

**Gene Silencing.** STC1 small hairpin RNA (shRNA) constructs were generated using BD Bioscience online shRNA oligo design tool and BD Knockout RNAi Clone and Confirm Kit (Clontech Laboratories, Inc., Palo Alto, CA). Retroviral infections to generate stable cell lines were carried out as previously described (41). siRNA pools designed toward HDAC3, SRC-1, or nontargeting control siRNA (Dharmacon Inc., Lafayette, CO) were transiently transfected into HeLa (PR-null or stably expressing Flag tagged wt PR-B) or T47D K388R PR-B cells seeded at 500,000 cells/well in six-well plates using Dharmafect 1 reagent (Dharmacon Inc.). Cells were starved for 72 h and RNA harvested for real-time PCR (see below).

**RT-PCR and Real-Time Quantitative PCR.** T47D cell variants were plated at  $6 \times 10^5$  cells per 60-mm dish, serum starved for 48 h, and/or treated with 10 nM R5020, 100 nM RU486, or 10  $\mu$ M TSA (Sigma-Aldrich) for 6 to 48 h. HeLa cells were plated at  $2.5 \times 10^5$  cells per well in six-well plates, transfected with vector control, wt or K388R PR-B and either pSG5 or Cdk2-TY, and serum starved.





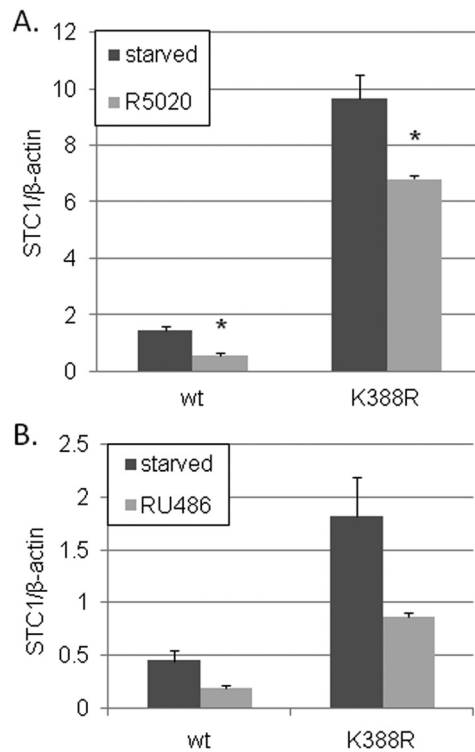

**Fig. S3.** Progestins mediate decreased STC1 expression. (A) STC1 regulation by R5020. T47D cells stably expressing wt or K388R PR-B were serum starved for 24 h and treated for 6 h with R5020 ( $10^{-8}$  M). Triplicate cultures were harvested, RNA was isolated, and real-time PCR was performed using primers specific for STC1 and  $\beta$ -actin; bars are expressed as STC1 mRNA normalized to  $\beta$ -actin ( $\pm$ SD,  $P < 0.02$ ). (B) PR antagonist regulation of STC1. T47D cells stably expressing wt or K388R PR-B were serum starved for 24 h and treated for 6 h with RU486 ( $10^{-7}$  M). Triplicate cultures were harvested, RNA was isolated, and real-time PCR was performed using primers specific for STC1 and  $\beta$ -actin; bars are expressed as STC1 mRNA normalized to  $\beta$ -actin ( $\pm$ SEM).
